# Supplementary material for: Outgrowth of erlotinib-resistant subpopulations recapitulated in patient-derived lung tumor spheroids and organoids
Source: PubMed Central journal article supplement (PMC7478813; doi:10.1371/journal.pone.0238862), 2020-09-08
Supplement: pone.0238862.s017.pdf [file pone.0238862.s017.pdf]

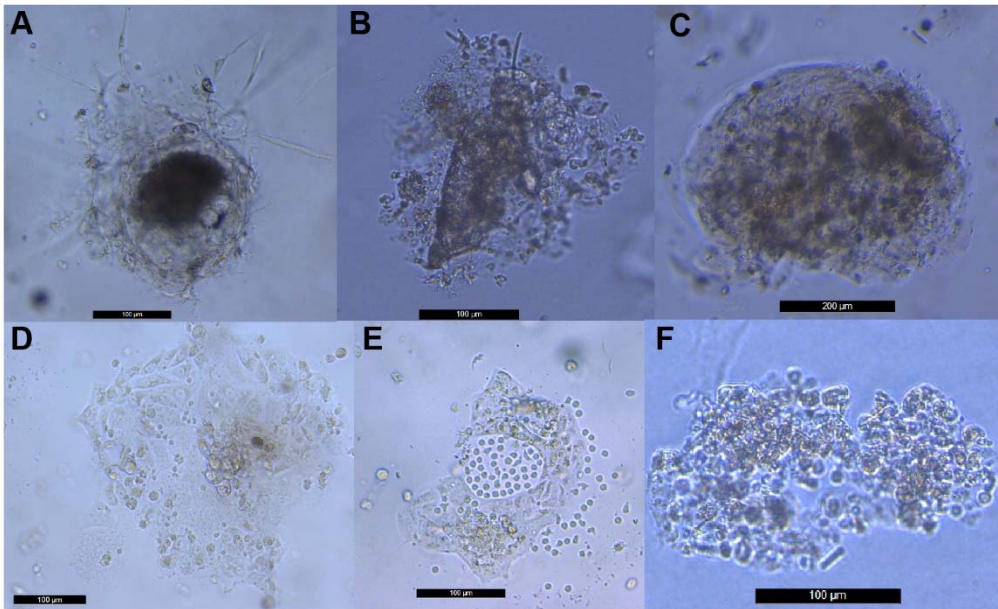

**S14 Fig. Additional Examples of Organoid Morphologies.** The organoids shown were cultured from Tumor 12 (panel A), Tumor 13 (panels B and F), Tumor 14 (panels C, D and E). The scale bar in panels A, B, D, E and F is 100  $\mu\text{m}$ . The scale bar in panel C is 200  $\mu\text{m}$ . D and E show organoids that appear to have attached to the bottom of the plate and grown primarily as 2D cultures.
